# Supplementary material for: Metabolites from Aerial Parts of Glycyrrhiza foetida as Modulators of Targets Related to Metabolic Syndrome
Source: MDPI journal article supplement (doi:10.3390/biom14040467), 2024-04-11
Supplement: s1 [file s1]

## Supporting data

# Metabolites from aerial parts of *Glycyrrhiza foetida* as modulators of targets related to metabolic syndrome

Hekmat B. Al-Hmadi<sup>1,2</sup>, Elena Serino<sup>3</sup>, Arianna Pastore<sup>3</sup>, Giuseppina Chianese<sup>3</sup>, Saoussen Hammami<sup>2</sup>, Mariano Stornaiuolo<sup>3,\*</sup> and Orazio Taglialatela-Scafati<sup>3,\*</sup>

<sup>1</sup> Department of Chemistry, College of Medicine, AL-Muthanna University, Samawah, Iraq; hekmat.alhmadi@mu.edu.iq (H.A-H.)

<sup>2</sup> Laboratory of Environmental Chemistry and Clean Processes (LR21ES04), Faculty of Sciences of Monastir, Monastir University, Monastir, 5000, Tunisia; h\_saoussen@yahoo.fr (S.H.)

<sup>3</sup> Department of Pharmacy, School of Medicine and Surgery, University of Naples Federico II, Via D. Montesano 49, 80131 Napoli, Italy; elena.serino@unina.it (E.S.); g.chianese@unina.it (G.C.); arianna.pastore@unina.it (A.P.)

|                                                                                                       |   |
|-------------------------------------------------------------------------------------------------------|---|
| <b>Figure S1:</b> <sup>1</sup> H NMR spectrum of compound <b>5</b> (CDCl <sub>3</sub> , 600MHz).....  | 2 |
| <b>Figure S2:</b> HSQC 2D NMR spectrum of compound <b>5</b> (CDCl <sub>3</sub> , 600MHz) .....        | 2 |
| <b>Figure S3:</b> HMBC 2D NMR spectrum of compound <b>5</b> (CDCl <sub>3</sub> , 600MHz) .....        | 3 |
| <b>Figure S4:</b> COSY 2D NMR spectrum of compound <b>5</b> (CDCl <sub>3</sub> , 600MHz).....         | 3 |
| <b>Figure S5:</b> <sup>1</sup> H NMR spectrum of compound <b>21</b> (CDCl <sub>3</sub> , 600MHz)..... | 4 |
| <b>Figure S6:</b> HSQC 2D NMR spectrum of compound <b>21</b> (CDCl <sub>3</sub> , 600MHz) .....       | 4 |
| <b>Figure S7:</b> HMBC 2D NMR spectrum of compound <b>21</b> (CDCl <sub>3</sub> , 600MHz) .....       | 5 |
| <b>Figure S8:</b> COSY 2D NMR spectrum of compound <b>21</b> (CDCl <sub>3</sub> , 600MHz).....        | 5 |

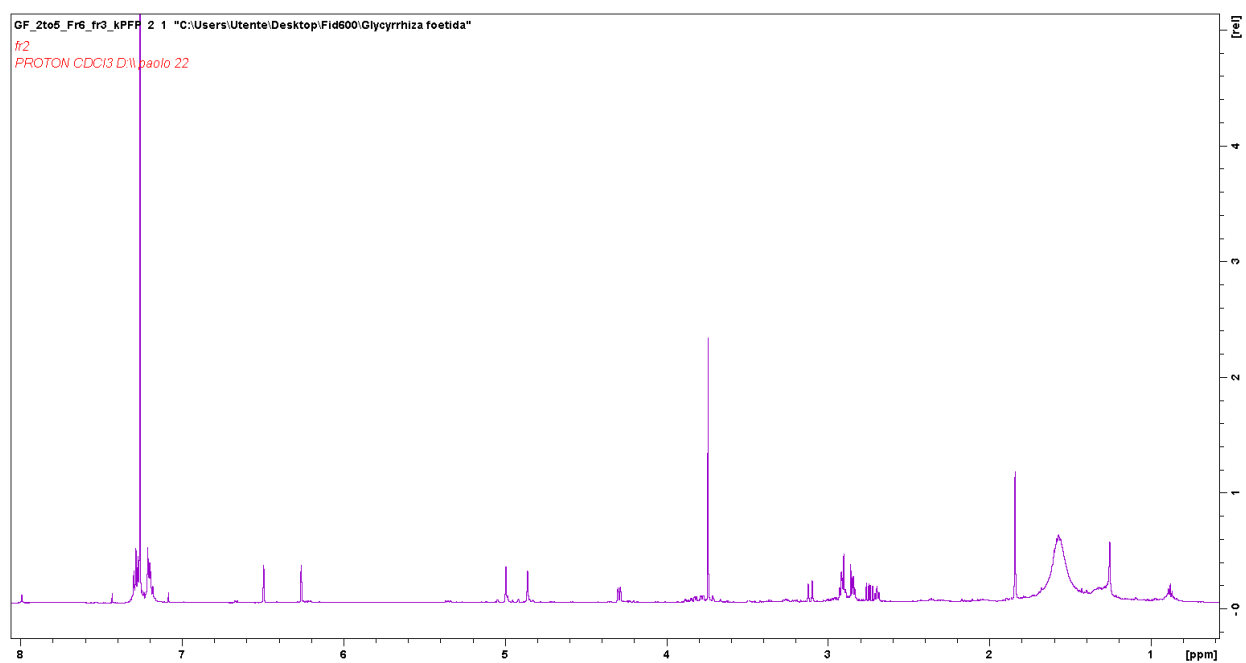

**Figure S1:** <sup>1</sup>H NMR spectrum of compound **5** (CDCl<sub>3</sub>, 600MHz).

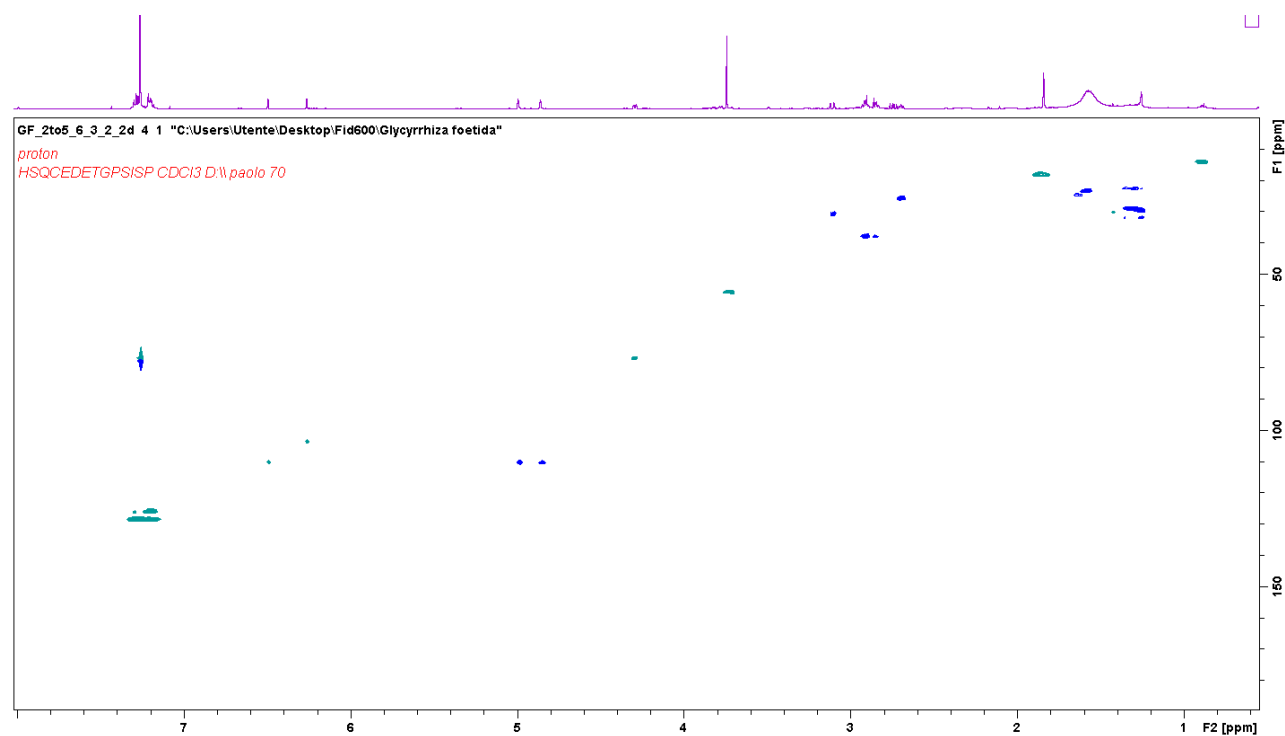

**Figure S2:** HSQC 2D NMR spectrum of compound **5** (CDCl<sub>3</sub>, 600MHz).

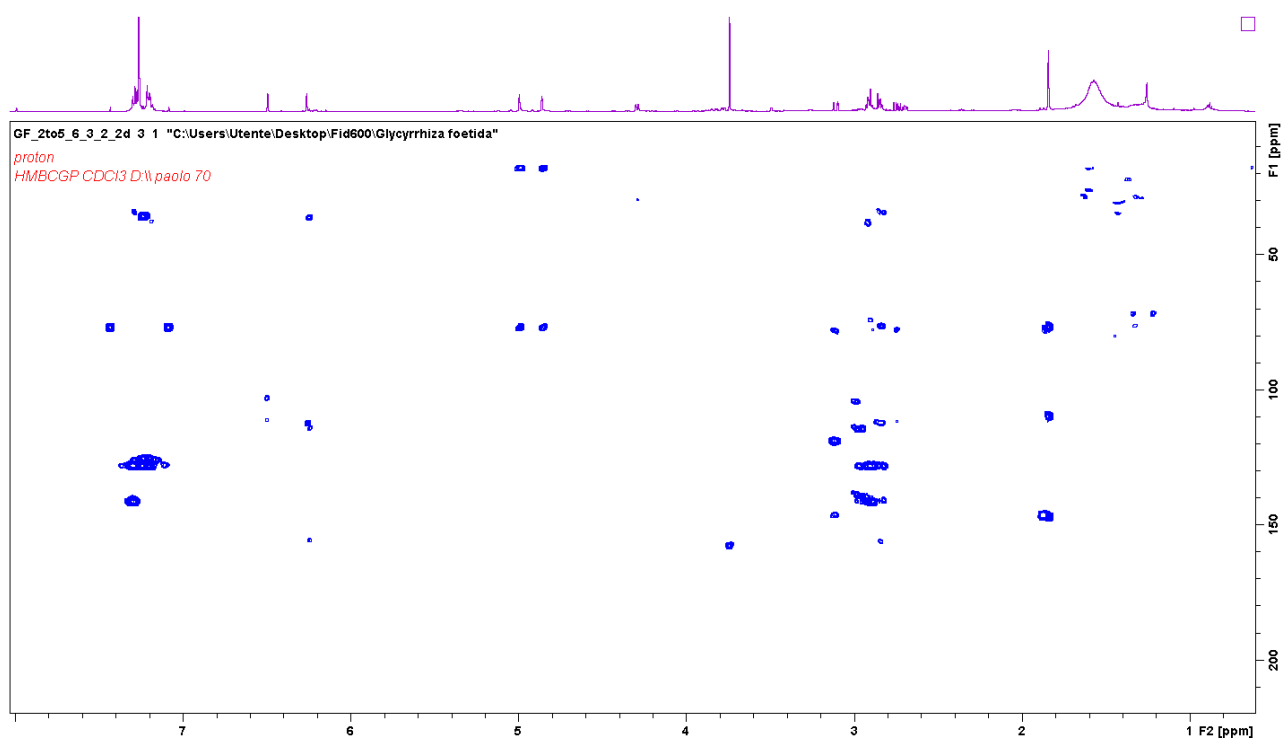

**Figure S3:** HMBC 2D NMR spectrum of compound **5** (CDCl<sub>3</sub>, 600MHz).

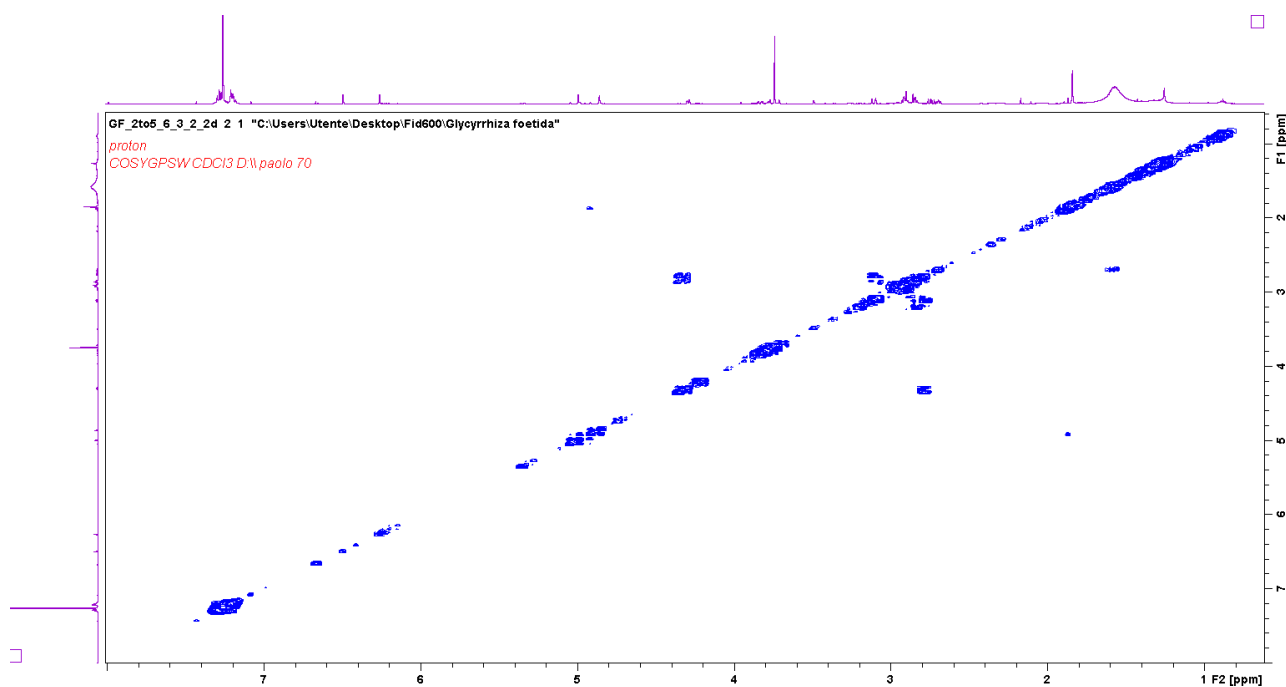

**Figure S4:** COSY 2D NMR spectrum of compound **5** (CDCl<sub>3</sub>, 600MHz).

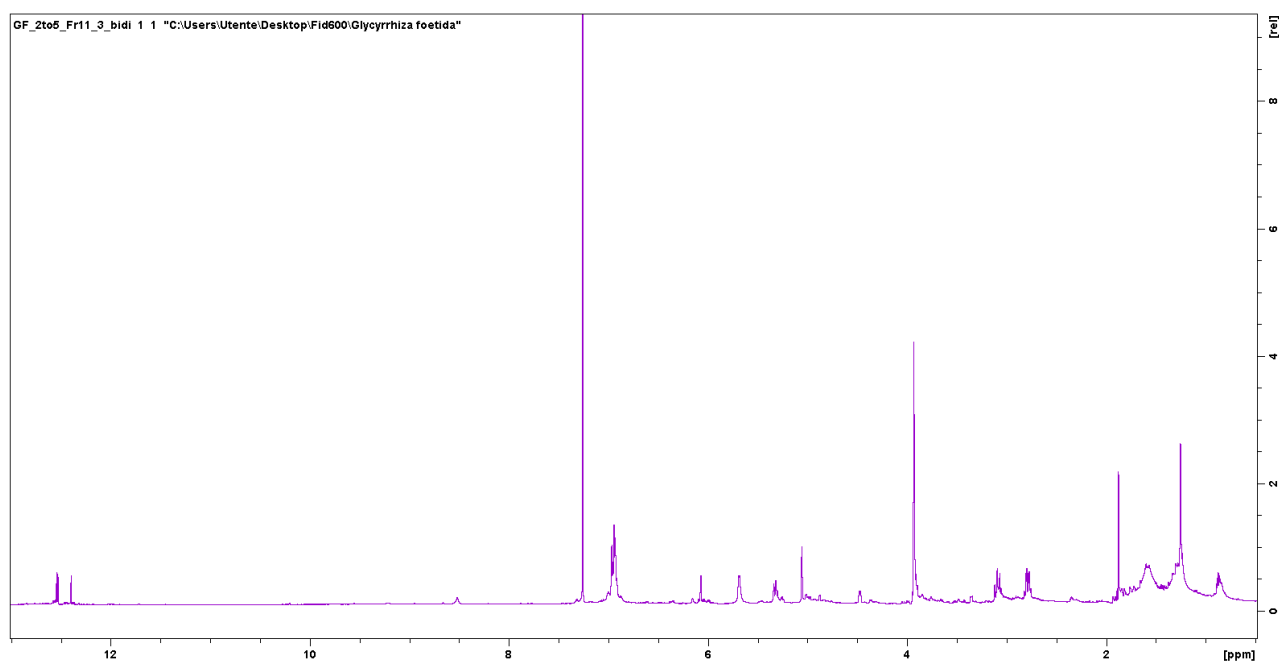

**Figure S5:**  $^1\text{H}$  NMR spectrum of compound **21** ( $\text{CDCl}_3$ , 600MHz).

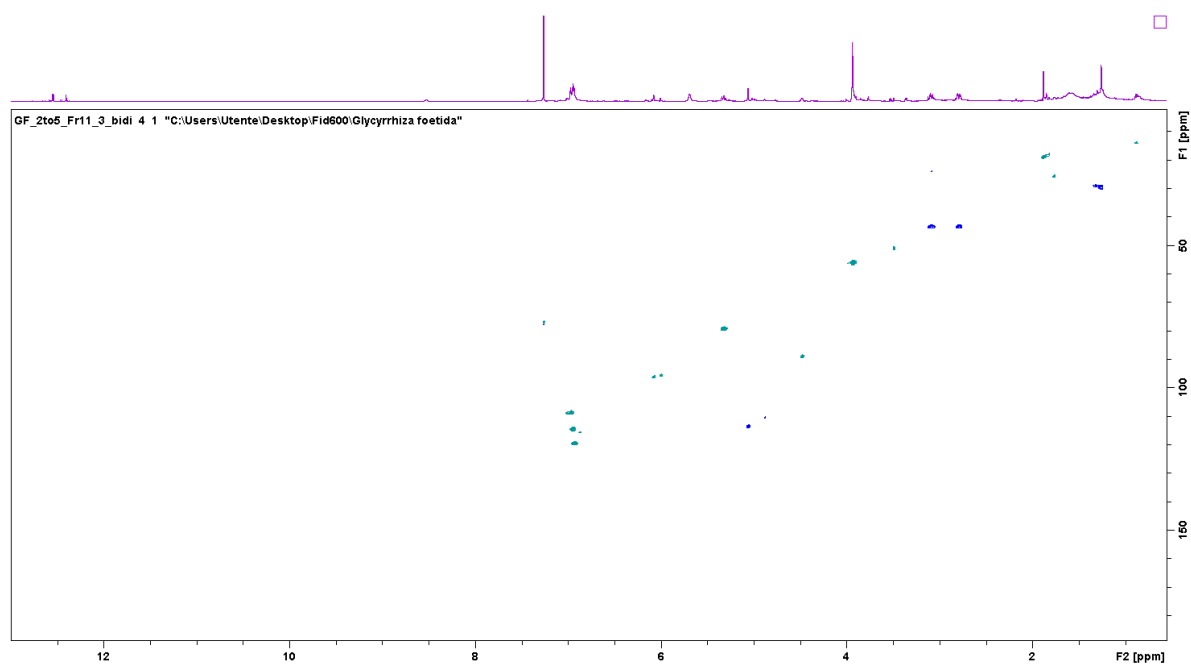

**Figure S6:** HSQC 2D NMR spectrum of compound **21** ( $\text{CDCl}_3$ , 600MHz).

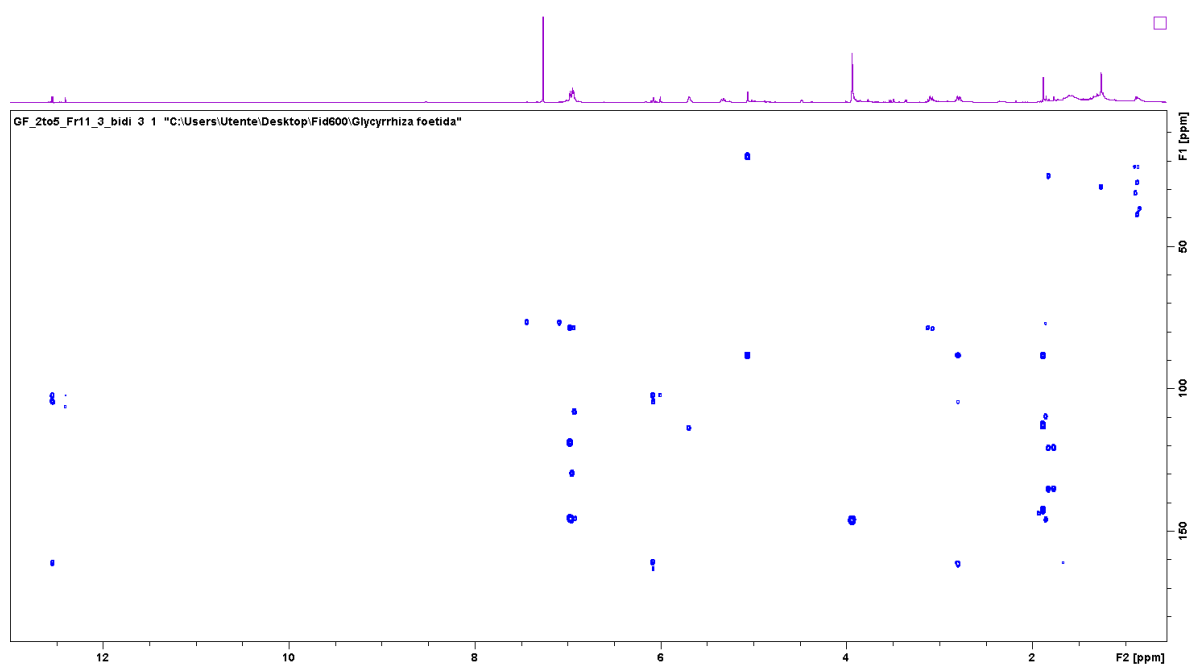

**Figure S7:** HMBC 2D NMR spectrum of compound **21** (CDCl<sub>3</sub>, 600MHz).

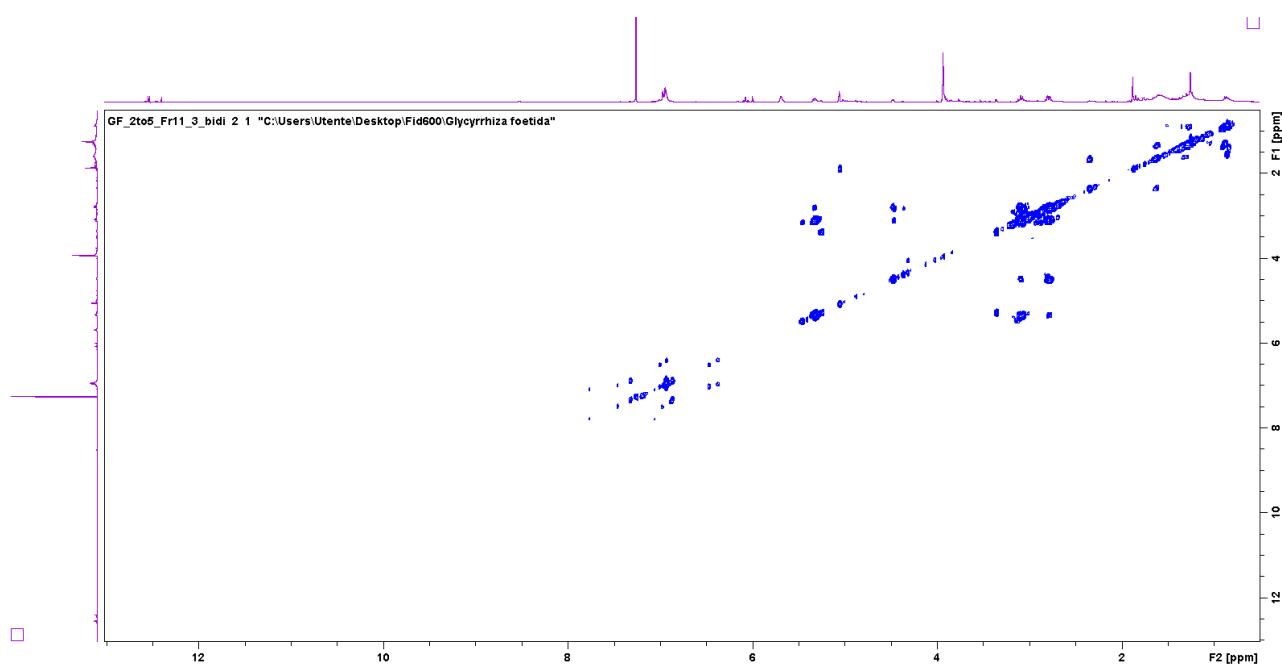

**Figure S8:** COSY 2D NMR spectrum of compound **21** (CDCl<sub>3</sub>, 600MHz).
